# Supplementary material for: Transcriptome Analysis Reveals Cotton (Gossypium hirsutum) Genes That Are Differentially Expressed in Cadmium Stress Tolerance
Source: PubMed Central journal article supplement (PMC6470502; doi:10.3390/ijms20061479), 2019-03-24
Supplement: ijms-20-01479-s001.pdf [file ijms-20-01479-s001.pdf]

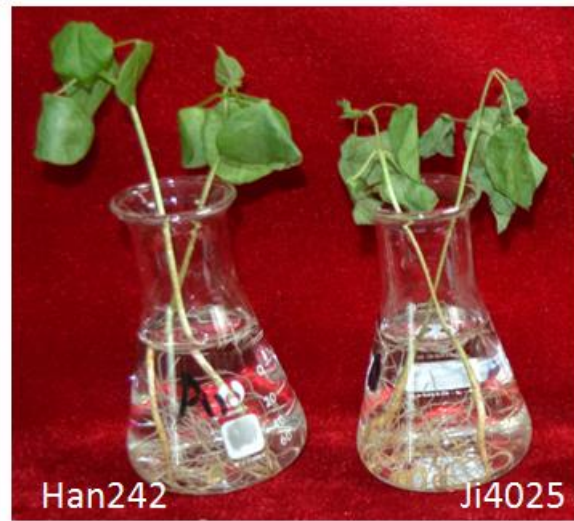

**Figure 1.** Phenotypes of different cotton varieties under cadmium stress for 4mM Cd.

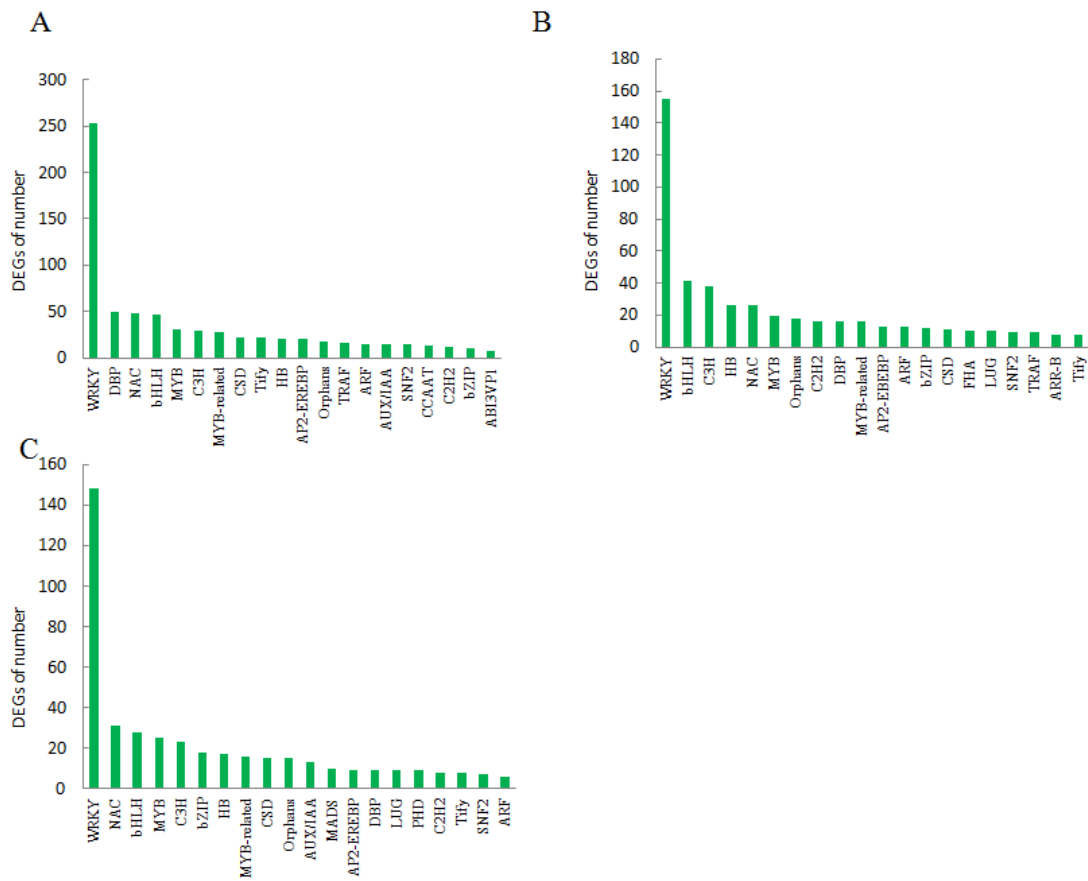

**Figure 2.** Expression of transcription factors in cotton roots, stems, and leaves under cadmium stress.

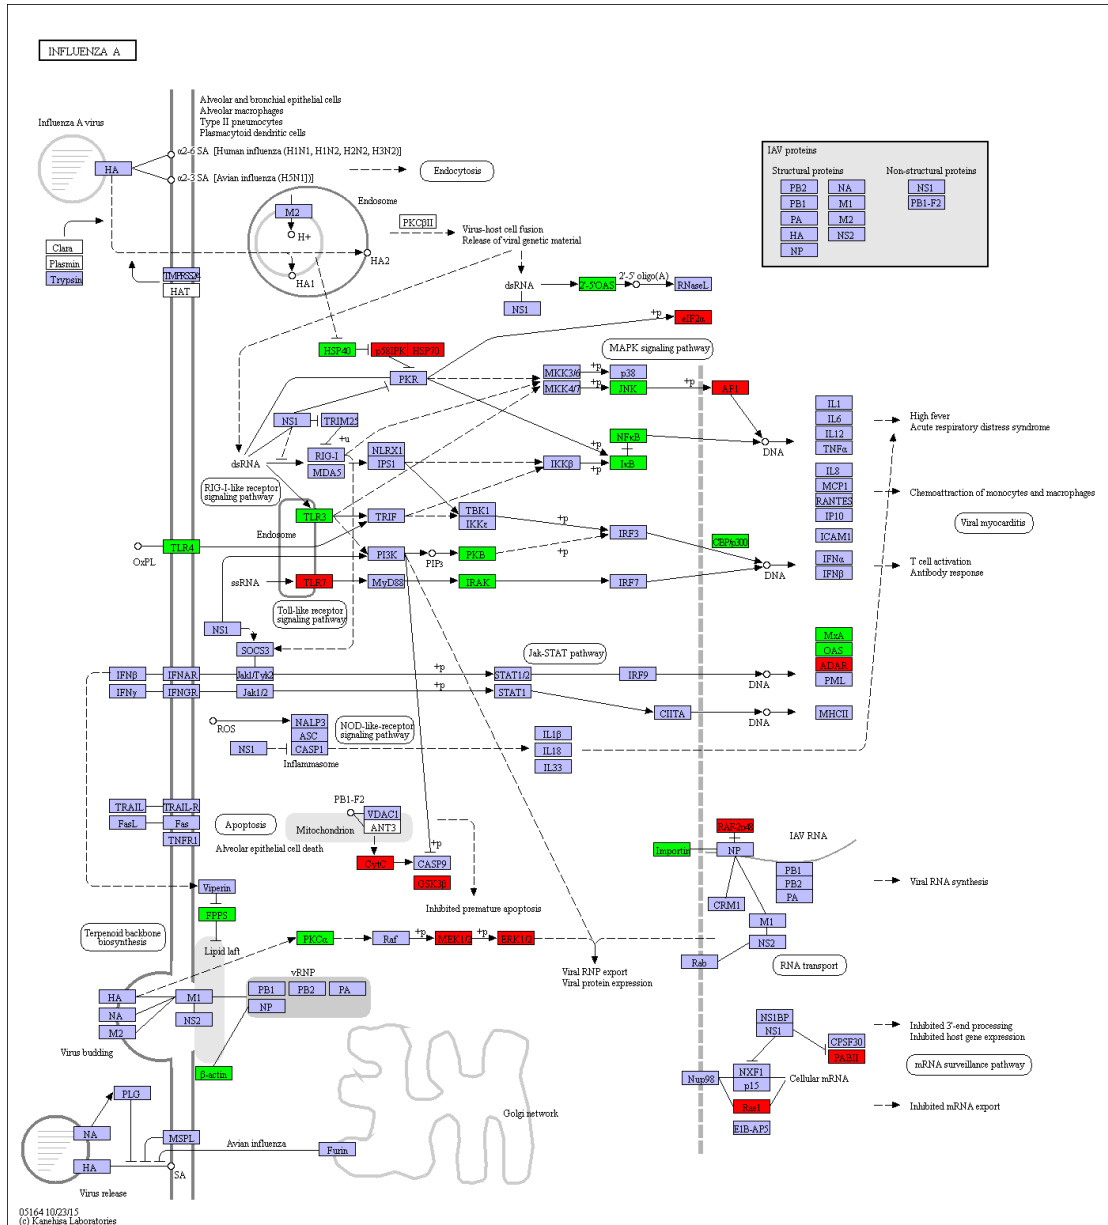

**Figure 3.** DEGs involved in Influenza A under Cd stress in cotton. Red and green squares indicate up- and down-regulated genes, respectively, and gray squares indicate genes whose expression did not change significantly.

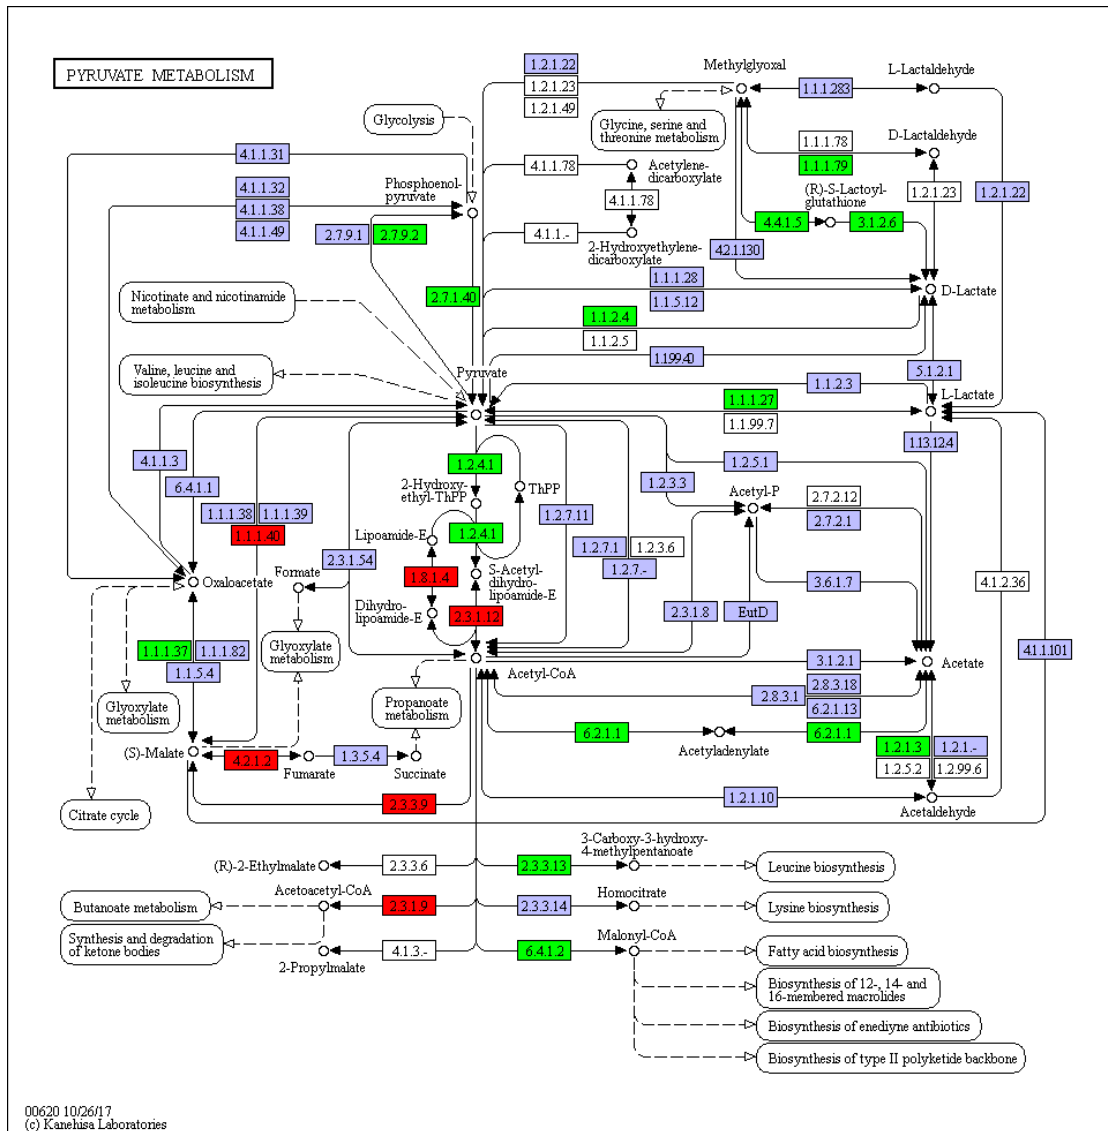

00620 10/26/17  
(c) Kanehisa Laboratories

**Figure 4.** Pyruvate metabolism pathways. Red and green squares indicate up- and down-regulated genes, respectively, and gray squares indicate genes whose expression did not change significantly.

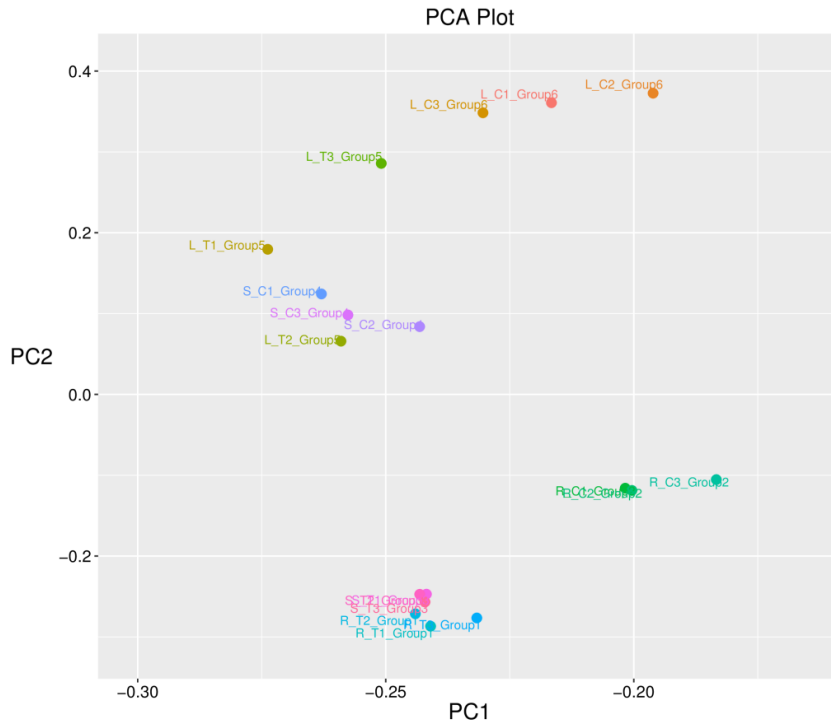

Figure 5. PCA analysis between three samples.

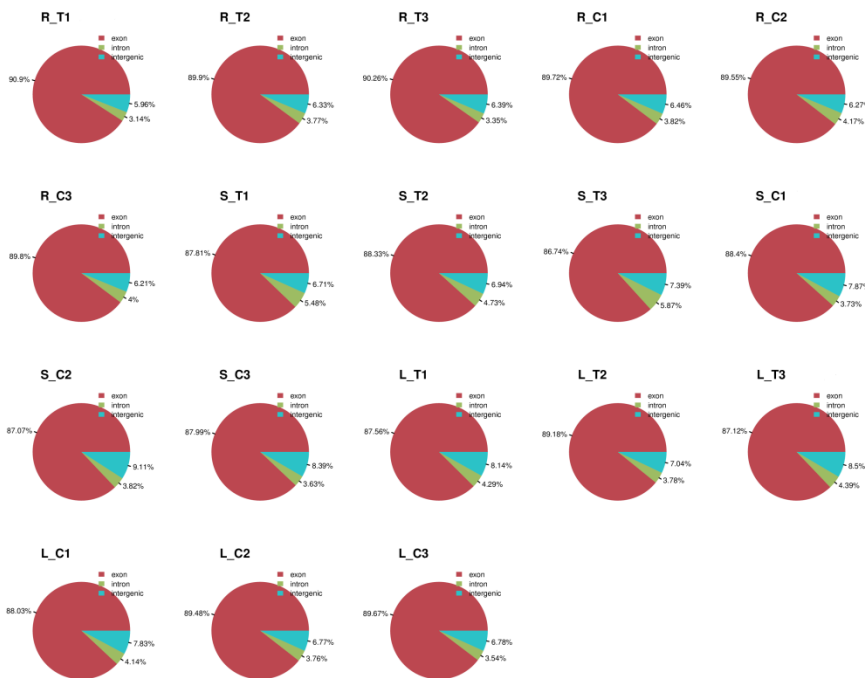

Figure 6. Purified and valid reads in each sample were mapped to the *G.hirsutum* genome.

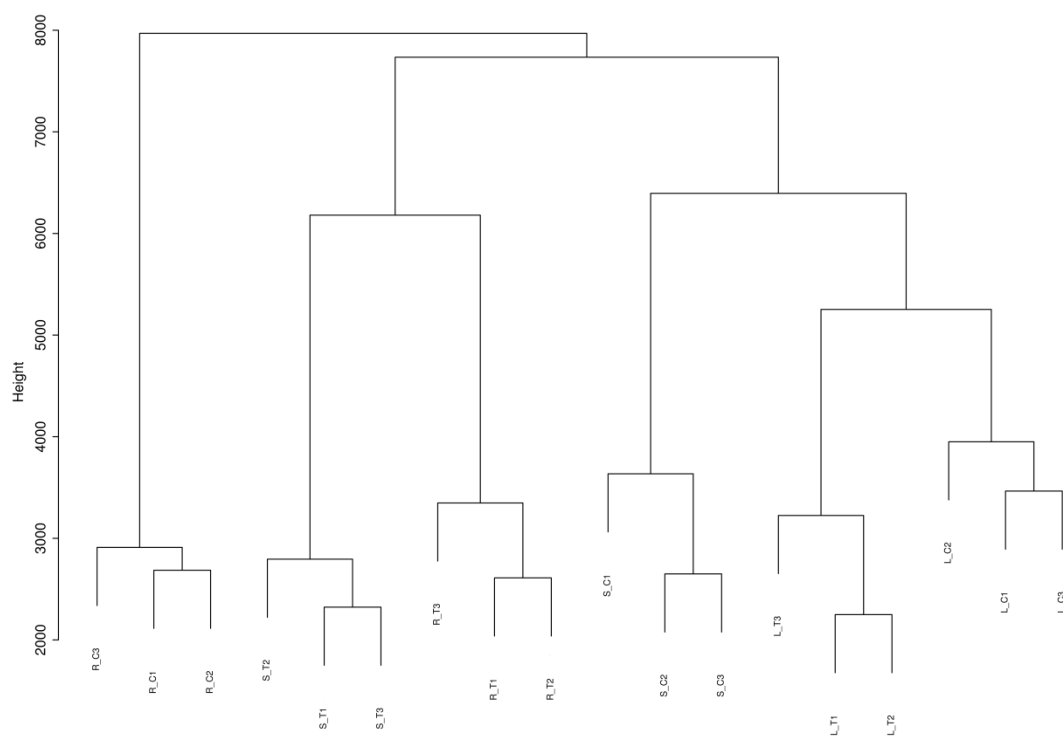

**Figure 7.** Samples clustering to detect outliers. R\_T1: Root Cd treatment 1, R\_T2: Root Cd treatment 2, R\_T3: Root Cd treatment 3, R\_C1: Root water control 1, R\_C2: Root water control 2, R\_C3: Root water control 3, S\_T1: Stem Cd treatment 1, S\_T2: Stem Cd treatment 2, S\_T3: Stem Cd treatment 3, S\_C1: Stem water control 1, S\_C2: Stem water control 2, S\_C3: Stem water control 3, L\_T1: Leaf Cd treatment 1, L\_T2: Leaf Cd treatment 2, L\_T3: Leaf Cd treatment 3, L\_C1: Leaf water control 1, L\_C2: Leaf water control 2, L\_C3: Leaf water control 3.

**Table 1.** Gene name, Gene annotation, and primers used for qRT-PCR validation.

| Gene name   | Primers                                             | Gene        | Primers                                              |
|-------------|-----------------------------------------------------|-------------|------------------------------------------------------|
| Gh_A01G1234 | F: CCCACGAACCAATCAACCT<br>R: GCGTTGCGTGTAAATTTGC    | Gh_D04G0262 | F:CACAAGCCCCATTGAGACCA<br>R:CGTTGACAACCTCGTCTCGT     |
| Gh_D11G2939 | F: GCCAATGCACGAAGAAGGGA<br>R: TTGCACTTGCCATCGTTCTC  | Gh_D04G0260 | F:ACCCATTACAGGCTCTGGGA<br>R:CCAAAGTGCTTCATCGCAGG     |
| Gh_D06G0421 | F: TGATTGGGACAGCCTTTGGA<br>R: CCCATATCTCTGCAGGCCAA  | Gh_A01G2049 | F:CCATTTCCGTGTTGGAATCCG<br>R:TCAACCCAACCAACATCACCT   |
| Gh_D04G1180 | F: GGGCTCCCTCGTGAATGTT<br>R: CAACGTCAAGGAGACCACGA   | Gh_A07G1285 | F: CAAAAGTGTGGCTGGGTTGA<br>R:CTGTCAACTGCTTTGCCTTCA   |
| Gh_A11G2566 | F:ACGAAGGAAACAGCAACAC<br>R: TTGCACTTGCCATCGTTCTC    | Gh_D07G1640 | F:GTAGTCGGTTTCTCAGGGGTG<br>R:GCTCTTCTTAGCCGACTTGT    |
| Gh_A04G0265 | F: TGACAAGAGCCAGTGTGTGAA<br>R: TTGCACTTGCCATCGTTCTC | Gh_D10G0078 | F: CCATCACGGTGGTATGCTGT<br>R: GTCGGGTTTCTTCTCCGGTT   |
| Gh_D08G1950 | F: TCGTTCAAGTCTGCCGATT<br>R: TCTGTGCTTCTTCGGTTGCT   | Gh_D13G1609 | F:ATGGACTTCATTTCCCGGCT<br>R:AGGCTTGGGTTGCCTGTTT      |
| Gh_A04G0713 | F: GGGCTCCCTCGTGAATGTT<br>R: CAAGCTCAAGGAGACCACGA   | Gh_D09G1816 | F:TTTCCGGTCTCTCCGGTGT<br>R:GCCGGTCCAACCGTTAAAATC     |
| Gh_A08G2485 | F:GGTGACTGGATGCTTGTGGA<br>R:TCATACACAGCCCAACCCTC    | Gh_A05G0151 | F:GATGTTGTGGCTGGCAATCAG<br>R:GAGGTCACTCCATCCATCTTTG  |
| Gh_D07G2124 | F:GTTGAAGCGGGACAGGAAT<br>R:AAAGCCAAGAGGAGTTGAGGG    | Ghaction    | F: TGACGGAGAATTAGGGTTCGA<br>R:CCGTGTCAGGATTGGGTAATTT |
| Gh_D08G2126 | F: GCAAGATGGAAGGGAACCGA                             |             |                                                      |

**Table 2.** Expression of heavy metal transport/detoxification superfamily proteins under Cadmium Stress in cotton.

| tissue | Gene name   | FC    | regulation |
|--------|-------------|-------|------------|
| Root   | Gh_A07G1285 | 0.18  | down       |
|        | Gh_A11G2427 | 0.38  | down       |
|        | Gh_D07G1640 | 0.20  | down       |
|        | Gh_D10G0078 | 0.16  | down       |
|        | Gh_D12G1886 | 0.29  | down       |
|        | Gh_A08G1780 | 3.88  | up         |
|        | Gh_A12G2298 | 2.59  | up         |
|        | Gh_D04G1066 | 3.77  | up         |
|        | Gh_D07G1023 | 2.96  | up         |
|        | Gh_D08G2126 | 5.48  | up         |
|        | Gh_D09G1816 | 4.04  | up         |
|        | Gh_D11G1515 | 2.85  | up         |
|        | Gh_D12G1507 | 2.82  | up         |
|        | Gh_A05G0151 | 4.24  | Up         |
| Stem   | Gh_A06G1738 | 0.04  | Down       |
|        | Gh_A12G0960 | 56.93 | up         |
|        | Gh_A12G1384 | 0.08  | down       |
|        | Gh_D07G2221 | 11.13 | up         |
|        | Gh_D08G2126 | 6.13  | up         |
|        | Gh_D11G2744 | 8.05  | up         |
|        | Gh_D12G1072 | 29.61 | up         |
|        | Gh_A05G0151 | 5.16  | up         |
| Leaf   | Gh_A06G1738 | 5.20  | up         |
|        | Gh_A07G1285 | 5.03  | up         |
|        | Gh_A09G1374 | 2.63  | up         |
|        | Gh_A11G1367 | 0.24  | down       |
|        | Gh_D04G1066 | 19.33 | up         |

|             |      |      |
|-------------|------|------|
| Gh_D07G2221 | 0.14 | down |
| Gh_D09G1375 | 2.69 | up   |

**Table 3.** The expression of hormone protein under cadmium stress in cotton.

| gene | Root | Stem | Leaf |
|------|------|------|------|
| IAA  | 28   | 15   | 17   |
| JA   | 24   | 9    | 7    |
| BR   | 9    | 4    | 5    |
| ETH  | 12   | 3    | 16   |
| ABA  | 5    | 3    | 4    |

**Table 4.** The expression of methyltransferase in cotton by cadmium stress.

| transcript_id | Description                              | FC   |
|---------------|------------------------------------------|------|
| Gh_D11G0656   | <i>methylesterase 11</i>                 | 2.49 |
| Gh_D12G0234   | <i>methylesterase 3</i>                  | 2.37 |
| Gh_D11G3357   | <i>Methyltransferase-related protein</i> | 2.30 |
| Gh_A10G0592   | <i>methylesterase 12</i>                 | 2.16 |
| Gh_D11G0488   | <i>methylesterase 10</i>                 | 0.43 |
| Gh_D11G0487   | <i>methylesterase 10</i>                 | 0.31 |
| Gh_A05G2377   | <i>methylesterase 17</i>                 | 0.30 |
| Gh_A11G0421   | <i>methylesterase 10</i>                 | 0.25 |

**Table 5.** Statistics of functional genes with Cufflinks.

| Genes           | Root  | Stem  | Leaf  | Total  |
|-----------------|-------|-------|-------|--------|
| All gene        | 43842 | 45435 | 45885 | 135162 |
| Annotation gene | 38130 | 39462 | 39785 | 117377 |
| Novel gene      | 5712  | 5973  | 6100  | 17785  |
